# Supplementary material for: An effective medium of H2O and low-pressure CO2 for the selective hydrogenation of aromatic nitro compounds to anilines
Source: Royal Society of Chemistry journal article supplement (doi:10.1039/c0gc00246a), 2011-01-01
Supplement: c0gc00246a.pdf [file c0gc00246a.pdf]

## Supplementary Information

### An Effective Medium of H<sub>2</sub>O and Low-pressure CO<sub>2</sub> for the Selective Hydrogenation of Aromatic Nitro Compounds to Anilines

Xiangchun Meng,<sup>a</sup> Haiyang Cheng,<sup>b</sup> Shin-ichiro Fujita,<sup>a</sup> Yancun Yu,<sup>b</sup> Fengyu Zhao<sup>\*b</sup> and Masahiko Arai<sup>\*a</sup>

<sup>a</sup> Division of Chemical Process Engineering, Faculty of Engineering, Hokkaido University, Sapporo 060-8628, Japan. Fax: +81 11 706 6594; Tel: +81 11 706 6594; E-mail: [marai@eng.hokudai.ac.jp](mailto:marai@eng.hokudai.ac.jp)

<sup>b</sup> State Key Laboratory of Electroanalytical Chemistry, Changchun Institute of Applied Chemistry, Chinese Academy of Sciences, Changchun 130022, China. Fax: +86 431 8526 2410; Tel: +86 431 8526 2410; E-mail: [zhaofy@ciac.jl.cn](mailto:zhaofy@ciac.jl.cn)

## EXPERIMENTAL

### 1. Catalyst preparation

The following supported Ni catalysts were prepared: 41 wt-% Ni/Al<sub>2</sub>O<sub>3</sub>, 9 wt-% Ni/TiO<sub>2</sub>, and 16 wt-% Ni/TiO<sub>2</sub>. The former catalyst was prepared by co-precipitation using Ni(NO<sub>3</sub>)<sub>2</sub>·6H<sub>2</sub>O and Al(NO<sub>3</sub>)<sub>3</sub> with a Ni/Al atomic ratio of 1/1 [1]. The latter two ones were prepared by incipient wetness impregnation using TiO<sub>2</sub> (anatase) and Ni(NH<sub>3</sub>)<sub>6</sub>(NO<sub>3</sub>)<sub>2</sub> (for 9 wt-% Ni/TiO<sub>2</sub>) or Ni(NO<sub>3</sub>)<sub>2</sub>·6H<sub>2</sub>O (for 16 wt-% Ni/TiO<sub>2</sub>). The samples were dried at 120°C for 12 h and sieved out and the samples in size of <180 mesh were collected. Then the samples were heated at a rate of 5°C/min up to 450°C and calcined at this temperature for 5 h. Before hydrogenation runs, the Ni/Al<sub>2</sub>O<sub>3</sub> sample was reduced under H<sub>2</sub> flow at 610°C and the Ni/TiO<sub>2</sub> samples at 450°C. The size of Ni crystallites ranges from 2 to 15 nm with an average diameter of 8.5 nm for the reduced Ni/Al<sub>2</sub>O<sub>3</sub> sample, from 7 to 35 nm for the 9 wt-% Ni/TiO<sub>2</sub> sample, and from 5 to 28 nm for the 16 wt-% Ni/TiO<sub>2</sub> catalyst. The two Ni/TiO<sub>2</sub> catalysts, which were prepared from the different Ni precursors, were found to be the same with respect to the product selectivity but different in the total conversion because the Ni loadings were different.

The catalyst was reduced in a vertical quartz tube at that temperature for 2 h and cooled down to room temperature. The upper end of the quartz tube was externally ground and could be connected to an internally ground glass cap. A H<sub>2</sub> stream (70 ml/min) was introduced into the quartz tube from the upper end. After cooling, the H<sub>2</sub> flow was decreased to 5 ml/min; another plastic tube that was purged with high purity N<sub>2</sub> (5 ml/min) was connected to the

lower end of the quartz tube. The plastic tube on the upper end was removed as quickly as possible. The N<sub>2</sub> stream was increased to 50 ml/min and then the glass cap was replaced with a bent tube. The quartz tube and the bent glass tube were purged with N<sub>2</sub> for another 10 min, to remove the air in the bent tube. A certain amount of liquid (H<sub>2</sub>O, ethanol, *n*-hexane, or NB) was added into the reactor. The N<sub>2</sub> flow was decreased to 5 ml/min. The open end of the bent tube was first inserted into the liquid in the reactor and then the catalyst was removed into the autoclave reactor under the protection of N<sub>2</sub> flow. The catalyst sample was on the bottom of the liquid and the reactor was sealed at room temperature. By careful operation, we could avoid the contact of the reduced catalyst with air.

## 2. Hydrogenation runs

The hydrogenation of nitrobenzene (NB) was conducted over Ni/Al<sub>2</sub>O<sub>3</sub> at 50°C in a 50 cm<sup>3</sup> autoclave reactor. The reactor was charged with NB, a catalyst sample, and, if necessary, a liquid (H<sub>2</sub>O, anhydrous ethanol, or *n*-hexane), flushed with N<sub>2</sub> for 3 min, and placed into a water bath preset to the reaction temperature for 20 min. Then, H<sub>2</sub> was first introduced into the reactor up to 6 MPa and CO<sub>2</sub> (or N<sub>2</sub> in a few cases for comparison) to the desired total pressure with a high-pressure liquid pump. The reaction was conducted while the reaction mixture was being stirred with a magnetic stirrer. After the reaction, the reactor was cooled with an ice-water bath for 20 min and depressurized carefully. The reaction mixture in the medium of H<sub>2</sub>O or H<sub>2</sub>O–CO<sub>2</sub> was extracted with diethyl ether; in other cases, it was diluted with ethanol. The reaction products were analyzed with a gas chromatograph (GC-4000, GL Sciences, ZB-5 capillary column) using a flame ionization detector (FID) and GC-MS (Agilent 6890N). The hydrogenation of nitrosobenzene (NSB) and *N*-phenylhydroxylamine (PHA) was performed in the same reactor with similar procedures. For these reactions, anhydrous ethanol and *n*-hexane were purchased from Wako Pure Chemical Industries. NB and NSB (Sigma–Aldrich) were used as received; commercially unavailable PHA was synthesized according to the literature [2]. The formation of this compound was confirmed by FTIR and NMR (JEOL A200II) [3].

The hydrogenation of chloronitrobenzene (CNB) isomers was conducted at 35°C with the same reactor at 4 MPa H<sub>2</sub>. The hydrogenation of *o*-CNB was performed over 9 wt-% Ni/TiO<sub>2</sub>, and the hydrogenation of *m*- and *p*-CNB isomers over 16 wt-% Ni/TiO<sub>2</sub>. If necessary, the reaction mixture was extracted from water by diethyl ether for GC (Shimadzu GC-2010, Rtx-5 capillary column) analysis.

## 3. Phase behavior and FTIR measurements

The phase behavior of the reactant mixture in the presence of compressed CO<sub>2</sub> was examined by the naked eye through the transparent sapphire windows attached to an 85 (or 10) cm<sup>3</sup> high-pressure reactor.

The gas phase FTIR spectrum of PHA was collected with a FTIR spectrometer of JASCO FTIR-620 equipped with a 1.5 cm<sup>3</sup> high-pressure cell. The measurement was made at 50°C and at 4 MPa H<sub>2</sub> and 0 MPa CO<sub>2</sub>. PHA (5 mg) and H<sub>2</sub>O (5 µL) were added into the cell at room temperature. The cell was purged with H<sub>2</sub> three times and heated up to 50°C. Then, H<sub>2</sub> was introduced to 4 MPa. The stirring was continued for 3 min and stopped, and the FTIR spectrum was collected. The gas phase spectrum of PHA was obtained by using the PHA-absent system as background. The solid phase FTIR spectrum of PHA was measured at ambient conditions for a mixed powder of PHA and KBr using the same spectrometer. The FTIR spectrum of PHA in liquid H<sub>2</sub>O was measured for a thin liquid film jammed by KBr crystal plates under ambient conditions.

## References

- [1] X. Meng, H. Cheng, Y. Akiyama, Y. Hao, W. Qiao, Y. Yu, F. Zhao, S. Fujita and M. Arai, *J. Catal.*, 2009, **264**, 1-10.
- [2] O. Kamm and C. S. Marvel, *Org. Synth.*, 1925, **4**, 57-59.
- [3] O. Corminboeuf, P. Renaud, *Org. Lett.*, 2002, **4**, 1731-1733.

## RESULTS

### 1. Hydrogenation of NB

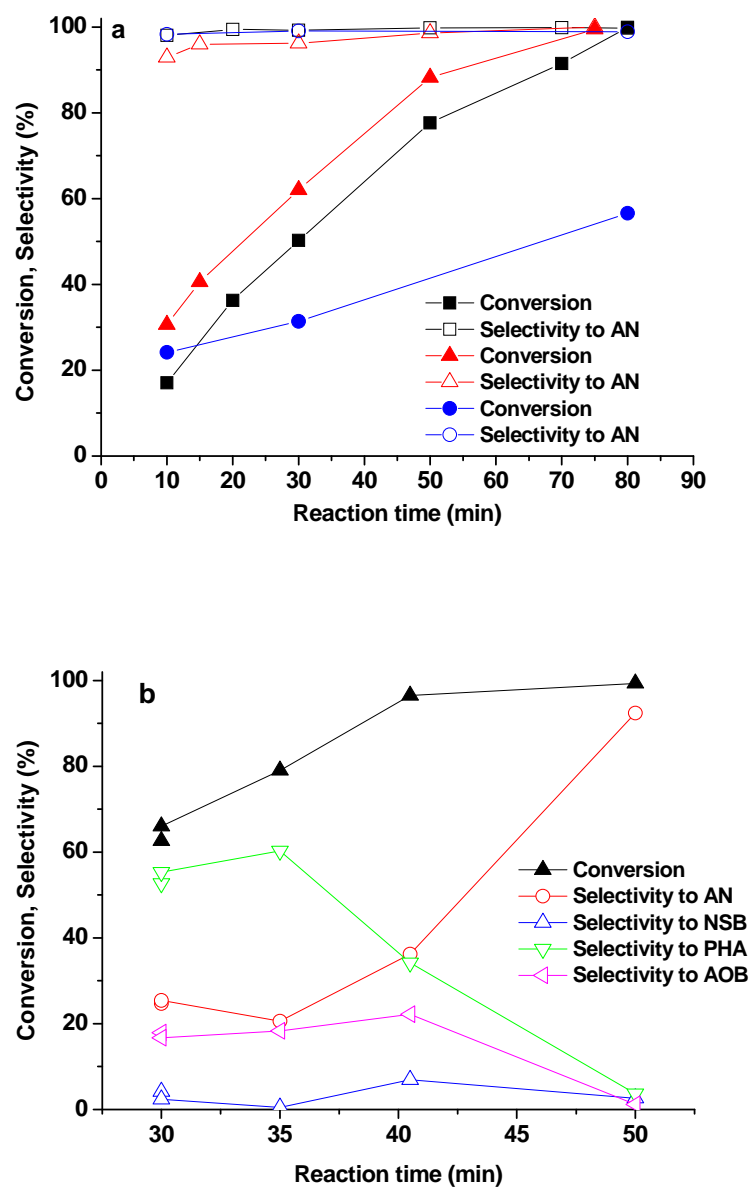

**Fig. S1** Evolution of species with time during the hydrogenation of NB over Ni/Al<sub>2</sub>O<sub>3</sub> in different reaction systems.

(a) (■, □)  $\text{scCO}_2$  (13.8 MPa); (▲, △)  $\text{H}_2\text{O}-\text{CO}_2$  (3 MPa); (●, ○)  $n$ -Hexane- $\text{CO}_2$  (4 MPa).

(b) Ethanol.

## 2. Phase behavior of the multiphase reaction mixture

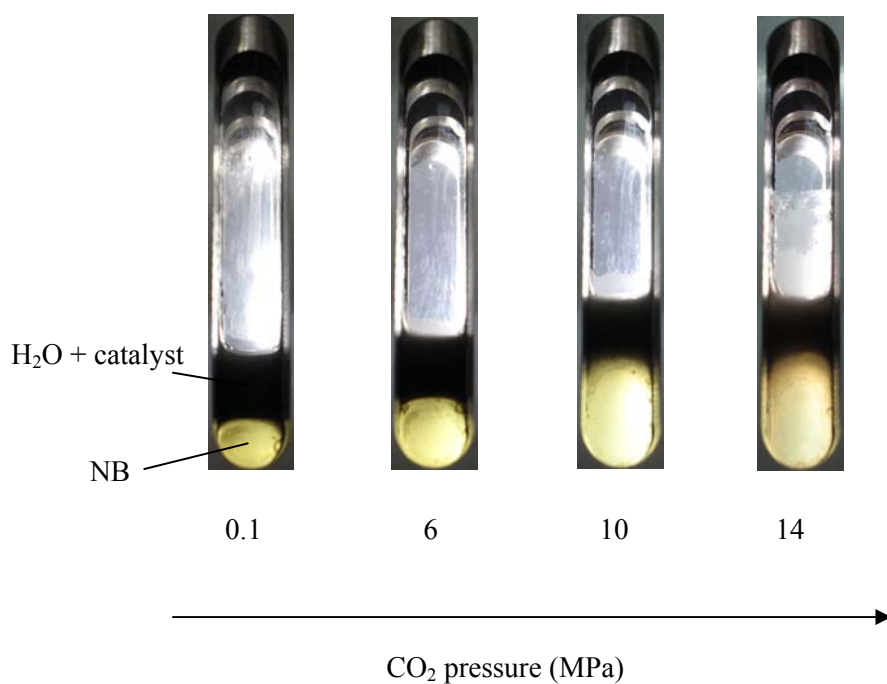

**Fig. S2** Distribution of Ni/Al<sub>2</sub>O<sub>3</sub> in the mixture of NB and H<sub>2</sub>O after the stirring was stopped. (NB 10 cm<sup>3</sup>, H<sub>2</sub>O 10 cm<sup>3</sup>, Ni/Al<sub>2</sub>O<sub>3</sub> 20 mg, H<sub>2</sub> 4 MPa.)

## 3. Comparison in the performance between Ni/Al<sub>2</sub>O<sub>3</sub> and Ni/TiO<sub>2</sub> catalysts

**Table S1** Results of *o*-CNB hydrogenation in the H<sub>2</sub>O–CO<sub>2</sub> system over 41 wt-% Ni/Al<sub>2</sub>O<sub>3</sub> and 9 wt-% Ni/TiO<sub>2</sub>

| Entry | Catalyst                          | Medium                                                             | Time<br>/min | Conv.<br>(%) | Selectivity (%)  |                 |        |
|-------|-----------------------------------|--------------------------------------------------------------------|--------------|--------------|------------------|-----------------|--------|
|       |                                   |                                                                    |              |              | CAN <sup>a</sup> | AN <sup>b</sup> | Others |
| 1     | Ni/Al <sub>2</sub> O <sub>3</sub> | H <sub>2</sub> O (10 cm <sup>3</sup> ) + CO <sub>2</sub> (6.8 MPa) | 31           | 51           | 89.4             | 9.6             | 1.0    |
| 2     | Ni/TiO <sub>2</sub>               | H <sub>2</sub> O (10 cm <sup>3</sup> ) + CO <sub>2</sub> (3.6 MPa) | 50           | 55           | 99.8             | 0.1             | 0.1    |

Reaction conditions: 41 wt-%Ni/Al<sub>2</sub>O<sub>3</sub> 0.1 g or 9 wt-% Ni/TiO<sub>2</sub> 0.15 g, 35°C, H<sub>2</sub> 4 MPa, *o*-CNB 1.5 g (9.52 mmol).

<sup>a</sup> CAN: chloroaniline. <sup>b</sup> AN: aniline.

#### 4. Hydrogenation of CNB isomers

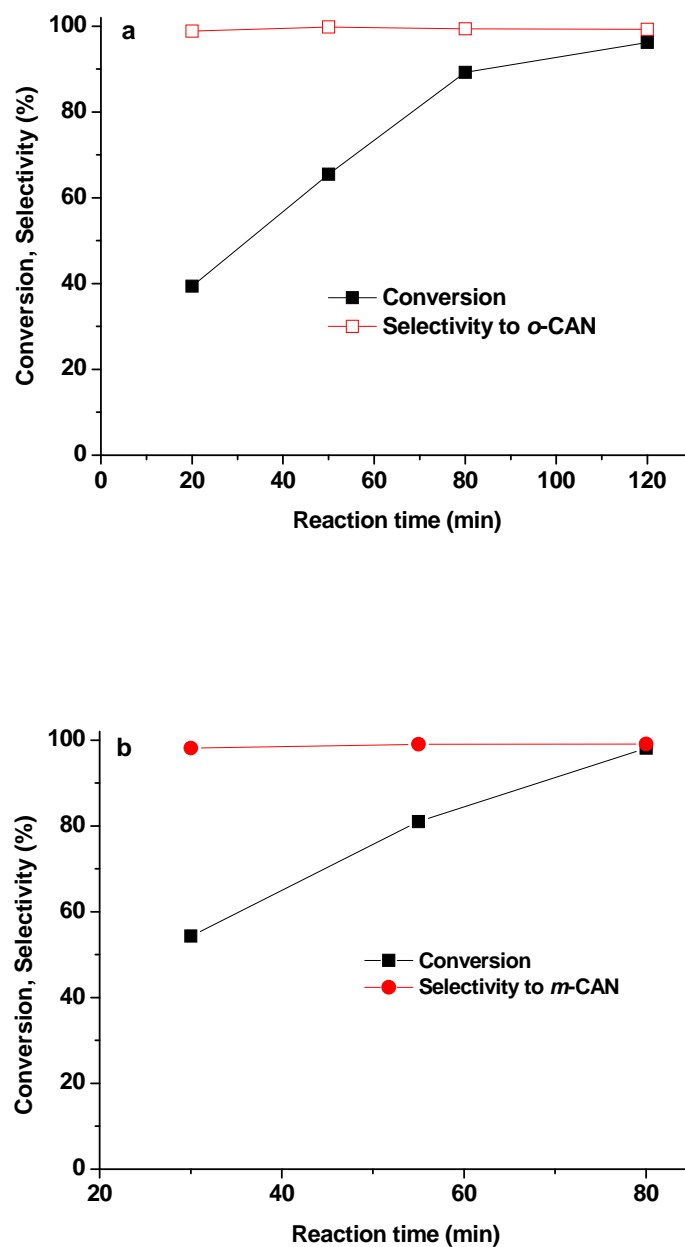

**Fig. S3** Change of conversion and selectivity to CAN with reaction time during the hydrogenation of CNB isomers over Ni/TiO<sub>2</sub> catalysts in the H<sub>2</sub>O-CO<sub>2</sub> (6 MPa) system. (a) Hydrogenation of *o*-CNB over 9 wt-% Ni/TiO<sub>2</sub>; (b) hydrogenation of *m*-CNB over 16 wt-% Ni/TiO<sub>2</sub>. (CNB 9.52 mmol, Ni/TiO<sub>2</sub> 0.15 g, H<sub>2</sub> 4 MPa, 35°C)

## 5. GC analysis for PHA

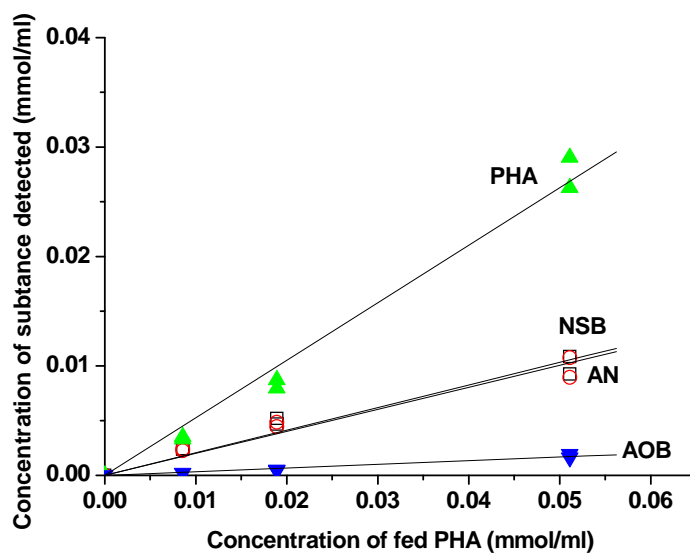

**Fig. S4** PHA decomposes partly into NSB, AN, and AOB during GC analysis. Analysis conditions: INJ temperature: 250°C; FID temperature: 250°C; oven temperature: from 80 to 288°C at 8°C/min. (▲) PHA; (□) NSB; (○) AN; (▼) AOB.
